# Supplementary material for: Characteristics of Whale Müller Glia in Primary and Immortalized Cultures
Source: Front Neurosci. 2022 Mar 14;16:854278. doi: 10.3389/fnins.2022.854278 (PMC8964101; doi:10.3389/fnins.2022.854278)
Supplement: Supplementary file 2 [file Data_Sheet_1.docx]

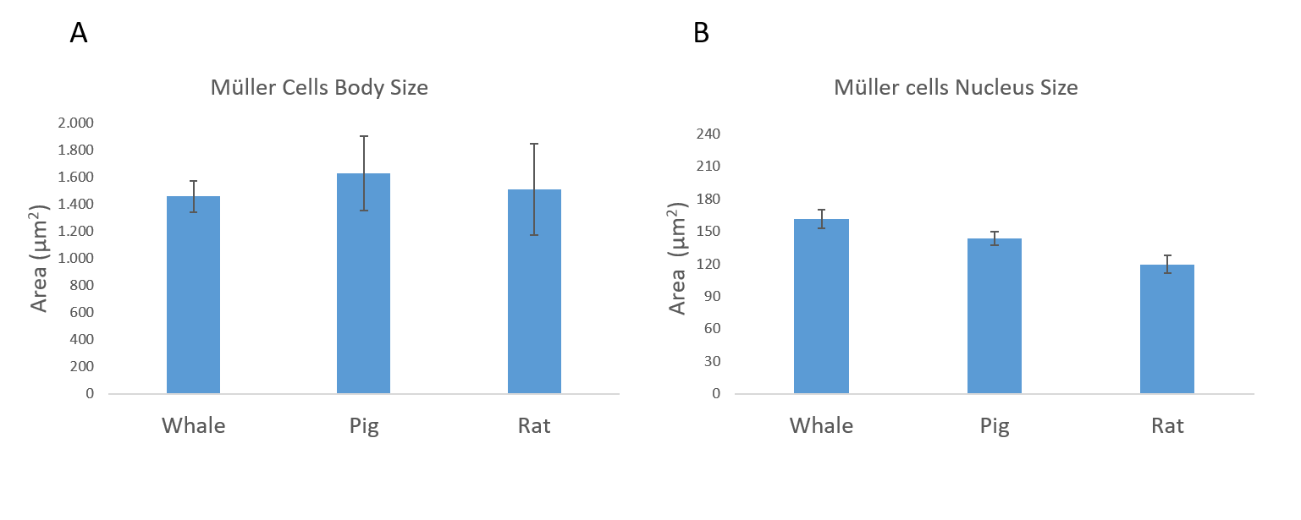


**Suppl. Figure 1. Analysis of the body and nucleus size from primary whale Müller cells compared to pig and rat Müller cells.** (A) Area (µm2) of the cell body from whale, pig and rat Müller cells. (B) Area (µm2) of the nucleus from whale, pig and rat Müller cells. No differences were found, one-way ANOVA, followed by Bonferroni test. (p-value>0.05).
